1 Coaching visits and supportive supervision for primary care facilities to improve malaria  
2 service data quality in Ghana: an intervention case study

3

4 Amos Asiedu<sup>1,2,\*¶</sup>, Rachel A. Haws<sup>3,4,5,\*¶</sup>, Wahjib Mohammed<sup>6</sup>, Joseph Boye-Doe<sup>1,2</sup>,  
5 Charles Agblanya<sup>1,2</sup>, Raphael Ntumy<sup>1,2</sup>, Keziah Malm<sup>6</sup>, Paul Boateng<sup>6</sup>, Gladys Tetteh<sup>4,5</sup>,  
6 Lolade Oseni<sup>4,5</sup>

7

8 <sup>1</sup> U.S. President’s Malaria Initiative (PMI), PMI Impact Malaria Project, Accra, Ghana

9 <sup>2</sup> Jhpiego Ghana, Accra, Ghana

10 <sup>3</sup> Department of International Health, Johns Hopkins Bloomberg School of Public Health,  
11 Baltimore, MD USA

12 <sup>4</sup>PMI, PMI Impact Malaria Project, Baltimore, MD USA

13 <sup>5</sup> Jhpiego, Baltimore, MD USA

14 <sup>6</sup>National Malaria Elimination Program, Ghana Health Service, Accra, Ghana

15

16 \* Corresponding authors

17 Amos Asiedu’s email: [amos.asiedu@jhpigo.org](mailto:amos.asiedu@jhpigo.org)

18 Rachel A. Haws’ email: [rhaws@jhmi.edu](mailto:rhaws@jhmi.edu)

19

20 ¶These authors contributed equally to this work.

## 21 **Abstract**

22 Effective decision-making for malaria prevention and control depends on timely, accurate, and  
23 appropriately analyzed and interpreted data. Poor quality data reported into national health  
24 management information systems (HMIS) prevent managers at the district level from planning  
25 effectively for malaria in Ghana. We analyzed reports from data coaching visits and follow-up  
26 supervision conducted to 231 health facilities in six of Ghana's 16 regions between February  
27 and November 2021. The visits targeted health workers' knowledge and skills in malaria data  
28 recording, HMIS reporting, and how managers visualized and used HMIS data for planning  
29 and decision making. A before-after design was used to assess how data coaching visits  
30 affected data documentation practices and compliance with standards of practice, quality and  
31 completeness of national HMIS data, and use of facility-based malaria indicator wall charts for  
32 decision-making at health facilities. The percentage of health workers demonstrating good  
33 understanding of standards of practice in documentation, reporting and data use increased from  
34 72 to 83% ( $p<0.05$ ). At first follow-up, reliability of HMIS data entry increased from 29 to  
35 65% ( $p<0.001$ ); precision increased from 48 to 78% ( $p<0.001$ ); and timeliness of reporting  
36 increased from 67 to 88% ( $p<0.001$ ). HMIS data showed statistically significant improvement  
37 in data completeness (from 62 to 87% ( $p<0.001$ )) and decreased error rate (from 37 to 18%  
38 ( $p<0.001$ )) from baseline to post-intervention. By the second follow-up visit, 98% of facilities  
39 had a functional data management system (a 26-percentage-point increase from the first  
40 follow-up visit,  $p<0.0001$ ), 77% of facilities displayed wall charts, and 63% reported using  
41 data for decision-making and local planning. There are few documented examples of data  
42 coaching to improve malaria surveillance and service data quality. Data coaching provides  
43 support and mentorship to improve data quality, visualization, and use, modeling how other  
44 malaria programs can use HMIS data effectively at the local level.

## 45 **Introduction**

46 Efficient and sustainable decision-making for disease prevention and control depends on  
47 timely, accurate, well-collected, appropriately analyzed, and effectively interpreted data (1). In  
48 low- and middle-income countries (LMICs), routine data for decision-making are available  
49 primarily through each country's national Health Management Information System (HMIS)  
50 (2). It is important that data collected are of sufficient quality to allow regular tracking of  
51 progress for monitoring impact, scaling up interventions, and strengthening health systems (3–  
52 6). Routine service data are often poor quality or incomplete, and may be misleading or of  
53 limited use for planning and decision-making (3,7). Concerns about data quality often limit the  
54 use of routine service data for prioritizing or targeting program activities, as stakeholders do  
55 not trust the integrity of aggregated datasets enough to rely on their analysis for decision-  
56 making (7,8). Recent efforts by ministries of health and stakeholders to improve the quality of  
57 HMIS data have prompted interventions at the district level to improve data quality and use,  
58 including technological innovations, capacity strengthening, data quality audits, and supportive  
59 supervision approaches (9–11).

60 Gaps in data quality illustrate the need for improved quality of data to inform decision making  
61 for malaria prevention, control, and elimination efforts (7). An assessment of National Malaria  
62 Strategic Plans (NMSPs) in 22 countries in sub-Saharan Africa showed that challenges in  
63 surveillance, monitoring, and evaluation (SME) included weak health information systems,  
64 incomplete data collection, poor data quality, inadequate data management and use and a lack  
65 of integration of monitoring systems (12). Data management issues such as failing to report  
66 certain malaria indicators and data reporting delays generally remained unaddressed in  
67 subsequent NMSPs. Poor motivation, inadequate supervision, absent feedback mechanisms,

68 and competing disease-specific reporting requests that burden staff contribute to low quality in  
69 routine data reporting (13).

70 Ensuring that high-quality routine data are collected on malaria service provision will be  
71 essential to meet aggressive targets set by the World Health Organization (WHO) and RBM  
72 Partnership to End Malaria to move countries from malaria control to pre-elimination by 2030  
73 and reduce cases by 90 percent (14,15). Ghana aims to move six districts from malaria control  
74 to pre-elimination by 2025. Studies from countries that have reached the malaria elimination  
75 stage have proposed that data-driven decision-making and improved surveillance are essential  
76 to address technical, operational, and financial challenges associated with pursuing the goal of  
77 elimination, with surveillance as a core intervention (16). Surveillance is generally weakest in  
78 countries with a high malaria burden, underlining the importance of the need for a robust  
79 surveillance system (14). It is essential that quality data on malaria service delivery are  
80 available and accessible to policy makers, facility managers, and health workers (17).

81 In Ghana, routine data at the facility level are reported monthly in the national electronic HMIS  
82 using open-source District Health Information System version 2 (DHIS2) software, which was  
83 introduced in 2012 to replace paper-based records and includes data validation, visualization  
84 and analysis tools. In Ghana, the DHIS2-based platform is called District Health Information  
85 Management System version 2 (DHIMS2). Since DHIMS2 became available, the percentage  
86 of health facilities submitting required monthly reports has risen from 11% in 2012 to 91.6%  
87 in 2021 (18). Health workers record provision of malaria-related services using specific  
88 recording and reporting tools in DHIMS2. Regular review of DHIMS2 data can be used to  
89 assess health system performance and for local planning and decision-making.

90 Supportive supervision visits, regional holistic assessments, and SME Technical Working  
91 Group meetings have revealed that health workers in Ghana, especially those posted at primary

92 care facilities, lack understanding of the Ghana Health Service standards of practice regarding  
93 health information management and how to record some data elements in registers and  
94 reporting forms. Additionally, reviews of routine DHIMS2 data have revealed disparities  
95 between and within regions in terms of data quality. This problem has led to errors in data  
96 capture, extraction, and reporting. As has been documented in other countries, health workers  
97 generally underutilize available data visualization tools and techniques to facilitate the use of  
98 local facility data for planning and decision making (7,19–21).

99 Primary health care workers at Community Health Planning and Services (CHPS) compounds  
100 and health centers in Ghana play a critical role in collecting, documenting, and reporting  
101 malaria service data. Service providers enter patient-level information in facility registers and  
102 collate data into monthly reporting forms; they also complete monitoring charts to guide  
103 clinical meetings and procurement of supplies. Data managers at district level and in some  
104 larger and higher-volume facilities conduct data verification and validation of monthly  
105 reporting forms and registers with service providers, enter data into DHIMS2, and review data  
106 for facility performance and local planning. In facilities without data managers, service  
107 providers often perform these roles. Coaching them in proper data documentation could  
108 improve the quality of the data they collect, reducing the risk of errors, missing information,  
109 or duplicate entries (22). Strengthening capacity in good data management practices can ensure  
110 that routine data is reliable and usable for monitoring progress, evaluating programs, and  
111 informing best practices. Effective data management can also streamline processes and  
112 improve efficiency, freeing up time for health care providers to focus on patient care. Training  
113 health workers in basic data visualization techniques can empower them to track progress and  
114 make data-driven decisions at the local level. The U.S. President’s Malaria Initiative (PMI)  
115 Impact Malaria project conceptualized data coaching visits as a means to improve malaria data

116 quality and data use through targeted support to primary facilities with low baseline levels of  
117 data quality and completeness.

118 This case study evaluates how data coaching visits to targeted health facilities affected health  
119 workers' knowledge and skills in malaria data recording, extraction and reporting to DHIMS2,  
120 and subsequent changes in how managers visualized and used DHIMS2 data for planning and  
121 decision making.

## 122 **Data coaching intervention and evaluation** 123 **methods**

124 We used a before-after design to assess the effect of data coaching visits on data documentation  
125 practices and compliance with standards of practice for DHIMS2, quality and completeness in  
126 DHIMS2, and use of facility-based malaria indicator wall charts for decision-making at 231  
127 health facilities in six of Ghana's 16 regions. Follow-up visits and analysis of key malaria  
128 indicators in DHIMS2 were used to assess longer-term changes in data documentation,  
129 reporting, and use for decision-making. Findings from this case study illustrate how health  
130 workers' skills in malaria data documentation, reporting, and validation can be built and  
131 sustained.

132 Data coaching visits to facilities were designed to strengthen data managers' and service  
133 providers' competency in proper documentation in registers, accurate transfer of data onto  
134 reporting forms and into DHIMS2, and ability to use tools that track and present data on malaria  
135 indicators. Using the Plan-Do-Study-Act (PDSA) continuous improvement cycle (23), which  
136 is an iterative quality improvement approach that identifies problems and develops and tests  
137 potential solutions—"change ideas"—to these problems, managers were guided during these

138 visits to develop change ideas to address identified data gaps in their districts and facilities (Fig  
139 1).

#### 140 **Fig 1. Implementation framework**

141 Following the WHO High Burden High Impact (HBHI) strategy, we prioritized primary health  
142 facilities—health centers and CHPS—with poor data quality to receive data coaching visits.  
143 The intervention prioritized these facilities by using a prioritization matrix to select facilities  
144 with error rates exceeding 30 percent and data completeness rates less than 90 percent on three  
145 malaria indicators in national DHIMS2 data from August 2020 to January 2021. Error rate was  
146 calculated as the number of indicators flagged with errors during the data validation exercise  
147 divided by the total number of validated indicators. Completeness rate was calculated as the  
148 number of data elements reported in DHIMS2 divided by the total number of expected data  
149 elements. The three indicators were: 1) number of suspected malaria cases at outpatient  
150 department (OPD) tested for malaria using rapid diagnostic tests (RDT) or microscopy; 2)  
151 number of confirmed malaria cases, disaggregated by test type: RDT and microscopy; and 3)  
152 confirmed uncomplicated malaria cases treated with antimalarial artemisinin-combination  
153 therapy (ACT). A total of 231 out of 605 facilities in 52 districts in 6 of Ghana’s 16 regions  
154 were prioritized using the matrix.

155 Prior to the coaching visits, PMI Impact Malaria staff, in collaboration with National Malaria  
156 Elimination Program and Policy, Planning, Monitoring & Evaluation Division (PPMED) staff  
157 from the Ghana Ministry of Health, trained regional and district level malaria focal persons  
158 and health information officers on the data coaching tools and DHIMS2 standards of practice.  
159 Two teams made up of three staff (the district and regional health information officer and a  
160 malaria focal person) then provided data coaching visits to all facilities, with each team visiting  
161 two facilities per day and spending an average of 4 hours in each facility.

162 During each coaching visit, health workers were given a pre-test on knowledge about the  
163 various malaria-related registers and reporting forms, variables in registers (e.g., definition of  
164 old versus new cases), tools for data validation, and use of facility-based wall charts for  
165 planning. First, coaching teams reviewed facility data with health workers to compare the  
166 source (register) to the data reported to DHIMS2. Next, they coached health workers on register  
167 variables, completion of reporting forms, and data validation following DHIMS2 standards of  
168 practice. Coaching teams then presented a facility-based wall chart to explain proper  
169 documentation, reporting and the use of wall charts for local planning, demonstrating for  
170 participants how to complete and use malaria indicator wall charts to track the performance of  
171 malaria indicators at the facility level (See S1 Fig). During these visits, coaching teams also  
172 guided managers to develop change ideas using the PDSA continuous improvement cycle to  
173 address identified data gaps in their districts and facilities.

174 Coaching teams conducted two post-coaching follow-up visits three months and nine months  
175 after the coaching visit using the same assessment tools to assess improvement in data  
176 reporting, facility display of updated wall charts, and reported use of the dashboard and wall  
177 chart for decision-making.

178 To evaluate the intervention, we used a before-after design that assessed how the coaching  
179 visits improved health workers' knowledge about malaria data variables in registers, their  
180 reporting practices, and their competence in visualizing and using data for local planning and  
181 decision making. We also evaluated health workers' use of data for local planning over the  
182 course of the program and follow-up, and evaluated the experiences and perceptions of health  
183 workers and regional and district level supervisors who had participated in the data coaching  
184 activities via a satisfaction survey.



## 185 **Data collection**

### 186 **Facility performance monitoring system and quality of data being reported** 187 **in DHIMS2**

188 On three occasions—during the coaching visit (February 2021), the first follow-up visit (May  
189 2021), and the second follow-up visit (November 2021)—we assessed whether facilities had  
190 functional data management systems conforming to GHS standards of practice, and health  
191 worker understanding of the GHS standard performance monitoring system and data quality.  
192 The assessment evaluated health worker understanding of the facility data management system  
193 and compliance to GHS standards of practice for documenting data in DHIMS2. Regional and  
194 district level health information officers conducted the assessments using a standardized  
195 USAID Data Quality Assurance tool programmed on the KoboCollect App (24) and stored all  
196 collected data in the PMI Impact Malaria database. The tool assessed data quality across five  
197 dimensions: validity, reliability, integrity, precision, and timeliness. To measure improvement  
198 in the performance monitoring system of the facilities, we compared assessment scores from  
199 the second follow-up visit to the first follow-up and the initial coaching visit.

### 200 **Facility reporting data completeness and error rate in national DHIMS2** 201 **data**

202 We also assessed how improvements in the facility performance monitoring system translated  
203 to changes in data reporting completeness and error rates in national DHIMS2 data after the  
204 coaching visits by comparing seven tracked national malaria case management indicators from  
205 baseline (0-6 months prior to the coaching visit) to data from monthly reporting forms and  
206 registers from each facility from three periods after the coaching visits: midline (1-9 months  
207 post-coaching visit), endline (10-12 months post-coaching visit), and post-endline (13-16  
208 months post-coaching visit). These indicators included suspected cases of uncomplicated  
209 malaria, suspected cases of uncomplicated malaria tested, confirmed malaria cases, outpatients

210 treated with antimalarials, outpatients treated with artemisinin-combination treatments,  
211 suspected uncomplicated malaria cases tested using RDTs, and suspected uncomplicated  
212 malaria cases tested using microscopy. Facilities collated quantitative facility-level service  
213 data, reported monthly to DHIMS2, for the 231 health facilities targeted for the coaching visit.

## 214 **Data use for decision making and local planning**

215 We assessed whether and how facilities visualized data for decision making and data use for  
216 planning at the coaching visit, and again at the first and second follow-up visits. We used the  
217 KoboCollect App to collect observations on whether wall charts were displayed, updated, and  
218 being used for decision-making about procurement of supplies, workflow, adherence to  
219 guidelines, in-service trainings, and health education priorities. All data were stored in the PMI  
220 Impact Malaria database. We measured improvement in the accurate updating of facility-based  
221 wall chart and data use for local planning (e.g., ITN distribution, reducing delays in service  
222 provision, and identifying staff training needs) by comparing assessment scores from the first  
223 follow-up visit to the coaching visit, and the second follow-up visit to the first.

## 224 **Data coaching satisfaction survey**

225 We conducted an after-action review from March-April 2022 using an online satisfaction  
226 survey. We sent a Google Forms link via WhatsApp to health workers at facilities that had  
227 received coaching visits (N=462), as well as health information officers (N=52) and malaria  
228 focal persons (N=52). The survey link was closed in March 2022 after a convenience sample  
229 of 250 participants had responded anonymously to the survey. Facilities were randomly  
230 selected, but inclusion criteria included smartphone ownership and internet access, which  
231 limited the sample by approximately 40%. The survey assessed the opinions, experience, and  
232 perspectives of health workers, health information officers, and malaria focal persons about

233 how data coaching affected facilities' performance systems, data quality, use of data for  
234 decision making and data reporting in DHIMS2.

## 235 **Data analysis**

### 236 **Facility performance monitoring system**

237 We used a two-sample t-test at a 5% level of significance to detect differences in overall facility  
238 assessment scores between the first follow-up visit and the coaching visit, as well as between  
239 the second follow-up visit and the first follow-up visit.

### 240 **Effect on service delivery**

241 We used a paired t-test using Stata/IC version 14.2 to identify statistically significant changes  
242 over time in routine monthly DHIMS2 indicators on quality malaria case management (25).  
243 The analysis measured changes in data reporting completeness and error rates using the period  
244 0-6 months prior to the coaching visit as a baseline, comparing this to indicators from midline,  
245 endline, and post-endline periods after the data coaching visit.

### 246 **Data coaching satisfaction survey**

247 The study team read through survey responses and highlighted emergent themes individually  
248 in Atlas.ti Version 7.5 using a thematic analysis approach (26). Themes and codes were  
249 reviewed and discussed throughout the analytic process, and refined or adapted as needed based  
250 on emergent information from the survey responses. Data were analyzed by type of participant,  
251 then discussed and summarized, noting differences between types of participants. The team  
252 then collated and reached consensus on themes through team discussions.

## 253 **Data management and confidentiality**

254 No personally identifiable information was collected during the assessment. All secondary  
255 data included in the study were routine malaria service data that are publicly available.  
256 Project monitoring and evaluation data gathered during the coaching visits and follow-up  
257 visits included providers' sex, cadre, data coaching performance assessment score, and  
258 evidence of data use for decision making. Names of providers and their facilities were not  
259 collected. The qualitative satisfaction survey was anonymous: names and facility  
260 identification of health workers were not collected as part of the survey. All data collected  
261 and retrieved for the study were stored securely in the password-protected PMI Impact  
262 Malaria database.

263

## 264 **Ethical considerations**

265 This assessment obtained a non-human subjects research determination from the Johns Hopkins  
266 Bloomberg School of Public Health Institutional Review Board, Maryland, USA (IRB# 21543).  
267 Study participants who completed the satisfaction survey gave their written informed consent.

## 268 **Results**

### 269 **Participating facilities, health workers, and data coaches**

270 A total of 14 regional-level and 104 district-level supervisors, including malaria focal persons  
271 and health information officers from 52 districts across six regions, served as coaches and  
272 visited facilities. All 231 targeted health facilities received a coaching visit; 833 health workers  
273 (327 male; 506 female) participated in coaching visits at these facilities. Follow-up visits  
274 conducted 3 months and 9 months after coaching visits reached 1211 health workers at each

275 visit (578 male; 633 female). The same number of health workers were reached at each follow-  
276 up visit, though the individuals reached at each follow-up visit varied. Twenty-three percent  
277 (N=54) of the 231 targeted facilities were health centers, and the rest (N=177) were CHPS.

## 278 **Facility performance monitoring system and data quality** 279 **assessment**

280 Almost all performance monitoring scores and DHIMS2 standard of practice compliance  
281 improved from baseline to first follow-up visit (Table 1). The percentage of health workers  
282 demonstrating good understanding of documenting, reporting and use increased from 72 to  
283 83% ( $p<0.05$ ). Sixty percent of facilities were using standard malaria registers at the initial  
284 coaching visit, but at the second follow-up visit, 95% of the facilities were using standard  
285 malaria registers. While the percentage of facilities with functional data storage and  
286 management systems only increased slightly between the coaching visit and first follow-up  
287 visit, 98% of facilities had a functional data storage and management system by the second  
288 follow-up visit, from 72% at first follow-up visit ( $p<0.0001$ ).

289 Compliance of health workers with almost all standards of practice for DHIMS2 reporting had  
290 improved at the first follow-up visit (Table 1). Improvements were statistically significant for  
291 four discrete skills: ability to differentiate between a new and old case of malaria, reporting  
292 only new cases on the malaria section of OPD morbidity, reporting only old cases under “repeat  
293 attendances” on OPD morbidity returns, and reporting case management cascades (number  
294 suspected, tested with RDT or microscopy, confirmed positive, treated with ACT) in OPD  
295 morbidity returns. Data quality also improved by the first follow-up visit, including increased  
296 reporting of errors and correcting mistakes, data reviewed for accuracy, procedures used to  
297 ensure accurate data from registers to reporting, and avoiding double counting of malaria data.

298 **Table 1. Changes in performance, adherence to standards of practice, and data quality**  
 299 **after data coaching visit**  
 300

| <b>Performance Monitoring System and Data Quality Assessment</b>                                                                                                                                                       | <b>Coaching visit score (N=833, %)</b> | <b>First follow-up visit score (N=1211, %)</b> | <b>Difference (First follow-up vs. coaching visit) (percentage points)</b> | <b>p-value</b>    | <b>Second follow-up visit score (N=1211, %)</b> | <b>Difference (Second vs. first follow-up) (percentage points)</b> | <b>p-value</b>    |
|------------------------------------------------------------------------------------------------------------------------------------------------------------------------------------------------------------------------|----------------------------------------|------------------------------------------------|----------------------------------------------------------------------------|-------------------|-------------------------------------------------|--------------------------------------------------------------------|-------------------|
| <b>Monitoring System</b>                                                                                                                                                                                               |                                        |                                                |                                                                            |                   |                                                 |                                                                    |                   |
| Staff demonstrate good understanding of data recording, reporting and use                                                                                                                                              | 72%                                    | 83%                                            | <b>11 (2, 21)</b>                                                          | 0.046             | 89%                                             | 6 (-6, 18)                                                         | 0.353             |
| Functional facility data storage and management system                                                                                                                                                                 | 68%                                    | 72%                                            | 4 (-7, 15)                                                                 | 0.501             | 98%                                             | <b>26 (16, 36)</b>                                                 | <b>&lt;0.001*</b> |
| <b>DHIMS2 Standards of Practice Compliance</b>                                                                                                                                                                         |                                        |                                                |                                                                            |                   |                                                 |                                                                    |                   |
| Availability of GHS DHIMS2 SOP                                                                                                                                                                                         | 36%                                    | 48%                                            | 12 (-0.4, 24)                                                              | 0.057             | 50%                                             | 2 (-16, 20)                                                        | 0.825             |
| Staff able to differentiate between a new and old case* of malaria                                                                                                                                                     | 61%                                    | 89%                                            | <b>28 (18, 37)</b>                                                         | <b>&lt;0.001*</b> | 96%                                             | 7 (-2, 15)                                                         | 0.169             |
| Staff report only 'New Cases' of malaria for the malaria section of OPD monthly reporting form                                                                                                                         | 83%                                    | 94%                                            | <b>11 (4, 18)</b>                                                          | <b>0.012*</b>     | 89%                                             | -5 (-15, 5)                                                        | 0.301             |
| Staff report only 'Old Cases'* of malaria under repeat attendances in the OPD monthly reporting form                                                                                                                   | 73%                                    | 88%                                            | <b>15 (6, 24)</b>                                                          | <b>0.005*</b>     | 93%                                             | 5 (-5, 15)                                                         | 0.364             |
| Reporting case management cascade (number suspected, tested with RDT or microscopy, confirmed positive, treated with ACT) in OPD monthly reporting form, with first three indicators disaggregated by pregnancy status | 80%                                    | 93%                                            | <b>13 (5, 20)</b>                                                          | <b>0.005*</b>     | 93%                                             | 0 (-9, 9)                                                          | 1.000             |
| Errors in malaria data reported, have been tracked to their original source and mistakes corrected                                                                                                                     | 89%                                    | 83%                                            | 6 (-15, 3)                                                                 | 0.166             | 89%                                             | 6 (-6, 18)                                                         | 0.178             |
| Data is reviewed for accuracy before sending to the next level/entry into DHIMS2                                                                                                                                       | 42%                                    | 65%                                            | <b>23 (11, 35)</b>                                                         | <b>&lt;0.001*</b> | 82%                                             | <b>17 (2, 32)</b>                                                  | <b>0.039*</b>     |
| Appropriate procedures used to ensure accurate data transferred from registers to reporting forms                                                                                                                      | 53%                                    | 66%                                            | <b>13 (9, 25)</b>                                                          | <b>0.041*</b>     | 89%                                             | <b>23 (10, 36)</b>                                                 | <b>0.004*</b>     |
| Appropriate procedures for avoiding double counting of malaria data                                                                                                                                                    | 45%                                    | 65%                                            | <b>20 (10, 32)</b>                                                         | <b>0.002*</b>     | 80%                                             | 15 (-1, 30)                                                        | 0.071             |
| Systems and procedures in place to ensure timely reporting of malaria data                                                                                                                                             | 73%                                    | 83%                                            | 10 (-1, 20)                                                                | 0.068             | 89%                                             | 6 (-6, 18)                                                         | 0.354             |

301 \* An "old case" is defined as a client who tested positive for malaria within 28 days of the first episode.

## 302 Facility data quality reported to DHIMS2

303 Compared to baseline, the quality of data that facilities reported to DHIMS2 at the first follow-  
 304 up visit improved significantly across three dimensions of quality (Table 2). Reliability  
 305 increased from 29% to 65% ( $p<0.001$ ); precision increased from 48% to 78% ( $p<0.001$ ); and  
 306 timeliness of reporting increased from 67% to 88% ( $p<0.001$ ). By the second follow-up visit,  
 307 reliability had increased from 65% to 89% ( $p<0.05$ ). Integrity also improved from 66% at first  
 308 follow-up visit to 90% at the second follow-up visit ( $p<0.05$ ).

309 **Table 2. Changes in USAID Data Quality Assurance tool scores on data quality**  
 310 **dimensions after data coaching**

311

| Data Quality Assessment Dimension | Coaching visit score (N=833) | First follow-up visit* score (N=1211) | Percentage-point difference (first follow-up vs. coaching visit)<br>Mean (95% CI) | <i>p-value</i>    | Second follow-up visit* score (N=1211) | Percentage-point difference (second vs. first follow-up)<br>Mean (95% CI) | <i>p-value</i> |
|-----------------------------------|------------------------------|---------------------------------------|-----------------------------------------------------------------------------------|-------------------|----------------------------------------|---------------------------------------------------------------------------|----------------|
| Validity                          | 87%                          | 94%                                   | +7<br>(-8, +14)                                                                   | 0.079             | 94%                                    | 0<br>(-11, +11)                                                           | 1.000          |
| Reliability                       | 29%                          | 65%                                   | <b>+36</b><br><b>(+24, +48)</b>                                                   | <b>&lt;0.000*</b> | 89%                                    | <b>+24</b><br><b>(+11, +37)</b>                                           | <b>0.003*</b>  |
| Integrity                         | 54%                          | 66%                                   | +12<br>(-2, +24)                                                                  | 0.059             | 90%                                    | <b>+24</b><br><b>(+11, +37)</b>                                           | <b>0.002*</b>  |
| Precision                         | 48%                          | 78%                                   | <b>+30%</b><br><b>(+19, +41)</b>                                                  | <b>&lt;0.000*</b> | 89%                                    | +11<br>(-2, +23)                                                          | 0.116          |
| Timeliness                        | 67%                          | 88%                                   | <b>+ 21%</b><br><b>(+11, +31)</b>                                                 | <b>&lt;0.000*</b> | 91%                                    | +3<br>(-8, +14)                                                           | 0.597          |

312 First follow-up visit 3 months post-coaching; second follow-up visit 9 months post-coaching.

313

## 314 Data completeness and error rate in DHIMS2

315 Data in DHIMS2 for the study facilities showed statistically significant improvement in data  
 316 completeness, from 62% at baseline to 87% at midline ( $p<0.001$ ) and decreased error rate, from  
 317 37% at baseline to 18% at midline ( $p<0.001$ ). Error rates continued to drop in the period 10-12

318 months after the coaching visits compared to the period 1-9 months post-coaching visits  
 319 ( $p < 0.05$ ). Completeness also improved, but the difference was not statistically significant.

320 **Table 3. Error rates and completeness in DHIMS2 pre- and post-data coaching**

321

| DHIMS2 Data Reporting | Baseline (0-6 mos pre-coaching)<br>n=138 600 | Midline (1-9 mos post-coaching)<br>n=140 122 | Percentage-point difference midline vs baseline | Endline (10-12 mos post-coaching)<br>n=139 433 | Percentage-point difference endline vs midline | Post-endline (13-16 mos post-coaching)<br>n=139 433 | Percentage-point difference post-endline vs endline |
|-----------------------|----------------------------------------------|----------------------------------------------|-------------------------------------------------|------------------------------------------------|------------------------------------------------|-----------------------------------------------------|-----------------------------------------------------|
|                       | Mean % (+/- SD)                              | Mean % (+/- SD)                              | Mean % (95% CI)<br><i>p-value</i>               | Mean % (+/-SD)                                 | Mean % (95% CI)<br><i>p-value</i>              | Mean % (+/-SD)                                      | Mean % (95% CI)<br><i>p-value</i>                   |
| Completeness          | 62 (1.4)                                     | 87 (0.9)                                     | + 25<br>(+8, +15)<br>$p < 0.001$                | 94 (1.0)                                       | + 7<br>(-5, 13)<br>$p = 0.234$                 | 95 (1.8)                                            | +1<br>(-3, 8)<br>$p = 0.324$                        |
| Error rate            | 37 (1.7)                                     | 18 (1.4)                                     | -17<br>(-25, -13)<br>$p < 0.001$                | 10 (0.7)                                       | -8<br>(-18, -7)<br>$p = 0.035$                 | 8 (1.0)                                             | -2<br>(-6, 4)<br>$p = 0.180$                        |

322 DHIMS2: District Health Information Management System version 2, SD: standard deviation; CI: confidence  
 323 interval  
 324  
 325

## 326 **Effect on data use for decision making and local planning**

327 At the coaching visit, no health facilities had a facility wall chart or any other means to visualize  
 328 and use their data for decision making and local planning. However, by the first follow-up visit,  
 329 75% of facilities displayed wall charts; this figure rose to 77% at the second follow-up visit  
 330 (Fig 2). At the first follow-up visit, 84% of new health workers had been oriented to the use of  
 331 wall charts; this proportion fell slightly to 80% at the second follow-up visit. By the first follow-  
 332 up visit, 60% of facilities reported using data for decision making and local planning; this rose  
 333 further to 63% at the second follow-up visit. None of the differences between the first and  
 334 second follow-up visit were statistically significant.

335 **Fig 2. Wall chart availability and use after data coaching (N=231 facilities, N=1211**  
 336 **staff)**

337  
 338



## 339 **Participant experience survey**

340 A total of 250 health workers, malaria focal persons, and health information officers responded  
341 to the qualitative survey to share their experiences with the coaching visit (Table 4). Most were  
342 male (73.5%). More than half (63%) of the respondents were aged 30-39 years, with 31% aged  
343 20-29 years and 6% aged 40-49 years. More than half (53%) had between 1 and 5 years of  
344 work experience. Their responses reveal how the coaching visit improved data documentation  
345 and use by health workers at the CHPS, health centers, district and regional levels.

346 **Table 4. Background Characteristics of Participants (N=250)**

| Variable                 | Response(s) | N (%)      |
|--------------------------|-------------|------------|
| Gender                   | Female      | 66 (26.5)  |
|                          | Male        | 184 (73.5) |
| Age (year(s))            | 20-29       | 78 (31.0)  |
|                          | 30-39       | 156 (63.0) |
|                          | 40-49       | 16 (6.0)   |
|                          | 50-59       | 0 (0)      |
| Years of work experience | <1          | 66 (26.5)  |
|                          | 1-5         | 133 (53.0) |
|                          | 6-10        | 51 (20.5)  |

347

## 348 **Improved data quality**

349 Coaching participants roundly agreed that the coaching visits had helped to improve the quality  
350 of data documented and reported at their facility. They reported that the coaching had improved  
351 their understanding of documentation in the registers, reports, and the data collection process  
352 in the facility. Some added that the coaching had helped them to validate their data, and had  
353 improved the timeliness of their reporting. Service providers indicated that the wall charts

354 helped them to identify areas for improvement and that being able to see the number of malaria  
355 cases suspected, tested and given treatment helped them follow treatment protocols.

356 *“The training has helped to improve documentation in the consulting room register  
357 and led to timely submission of data.”* - Health information officer

358

359 *“In fact, data coaching visits have increased our knowledge on how to record data  
360 properly in the consulting room register, antenatal care register, outpatient register,  
361 and reports compilation in our facility.”* - Enrolled Nurse

362

## 363 **Adherence to malaria prevention and treatment guidelines**

364 Respondents reported that wall charts had significantly improved data accuracy, malaria  
365 diagnostic accuracy, and staff awareness through promoting improved adherence to  
366 guidelines:

367 *“Since the implementation of wall charts to improve adherence to malaria prevention  
368 and treatment guidelines, we have observed several improvements and changes  
369 among our staff. Here are some notable improvements: Adherence to Test, Treat,  
370 Track (T3), reduction of presumptive treatment, improved IPTp and ITN provision,  
371 and improved referral practices... Overall, the implementation of wall charts has  
372 positively impacted staff adherence to malaria prevention and treatment guidelines. It  
373 has promoted evidence-based practices, reduced presumptive treatment, increased  
374 adherence to IPTp and ITN provision, and enhanced appropriate referral practices.”*

375 – Senior Technical Officer

376

377           *“Of course, the wall charts have helped facilities adhere to the 3Ts in malaria case*  
378           *management. Facilities can determine the number of malaria cases tested and treated*  
379           *at a glance. And this guides them to monitor their RDT stock levels and put in*  
380           *requisition as soon as possible.” – Health Information Officer*

381  
382           *“Since the use of the wall chart, facilities learn to probe further into conditions*  
383           *reported to them and with the appropriate tests conducted. All positive malaria cases*  
384           *are put on antimalarials and asked to come back for review.” - Nurse*

385

## 386   **Local planning**

387   Some service providers reported using wall charts to monitor trends in indicators, both for  
388   planning and forecasting. Respondents noted that monitoring trends in indicators gave them  
389   advance notice of areas that needed improvement, and that monthly monitoring improves  
390   district indicators and identifies errors. Several respondents mentioned that action plans now  
391   consider positivity rates and the number of antenatal care registrants in their facilities.

392           *“The wall charts help us to identify indicators where we are not meeting the target*  
393           *and to plan...it helps us to monitor trends of health indicators.” – Health Information*  
394           *Officer*

395

396           *“The skills and knowledge I have acquired help me to prepare an action plan for the*  
397           *facility and also help in providing comprehensive care.” – Registered Nurse*

398

399            *“We have improved our district’s indicators due to monitoring on a monthly basis, also*  
400            *enabling us to identify errors with our data before the year ends.”* – Health Information  
401            Officer

402    Respondents frequently mentioned using wall charts to monitor key commodities such as ITNs  
403    and antimalarials. Respondents explained that the use of IPTp for guiding commodity  
404    allocation has reduced delays in commodity requests and helped monitor commodity stock  
405    levels, enabling timely restocking and demand forecasting. Health Information Officers  
406    mentioned that learning to monitor stock levels and trends on a monthly rather than annual  
407    basis has improved data quality and forecasting for commodities like ITNs and SP, preventing  
408    shortages. Wall charts also help facilities notice when commodities are running out, allowing  
409    for restocking to avert stockouts:

410            *“The coaching has helped us to enter data easily and it’s making our work very*  
411            *simple using the wall chart. At a glance at the graph, I can track our performances*  
412            *and coverage. It makes it easier to do my division and subtraction on the stock using*  
413            *the graph. We are now able to do our requisitions on time so that there will be no*  
414            *shortage of SP for IPTp when pregnant women come for ANC.”* - Registered Nurse

415  
416            *“Plans for procurement at the facility now take into consideration the positivity rate*  
417            *recorded whereas ITNs factors in the Number ANC Registrants at a specified period.”*  
418            – Health Information Officer

419  
420            *“Using the wall chart has been helpful to the facility in monitoring their stock level of*  
421            *commodities ... they do not run out of commodities.”*- Health Information Officer

## 422 **Discussion**

423 Coaching, supervision, and mentorship approaches have been used to improve health data  
424 reporting, analysis, and use in many health areas, but have been rarely detailed in the malaria  
425 literature, particularly at the facility level. This study, along with an emerging body of  
426 programmatic research, demonstrate that data coaching and other sustained data-focused  
427 supportive supervision and mentorship efforts can help improve data literacy, data quality, data  
428 visualization, data-driven decision making, and data culture.

429 The only other documented examples of data coaching for malaria programs come from  
430 Madagascar and Uganda. In Madagascar, PMI Measure Malaria developed a data coaching  
431 guide that defined the role of a coach, conduct of coaching visits, and performance indicators,  
432 and also provided a template to document action items (27). Coaching visits were associated  
433 with improved staff skills and confidence using DHIS2, improved data quality (completeness  
434 rose from 86 to 91 percent; timeliness rose from 54 to 81 percent), analysis, and visualization.  
435 In Kayunga, Uganda, a pilot of an intervention that included in-service training in 5 health  
436 centers, mentored continuous improvement with PDSA cycles, learning sessions, and coaching  
437 reported improvements in data completeness (28). Health workers appreciated coaching, but  
438 some expressed frustration with perceived additional workload from data collection and  
439 continuous improvement activities. Financial incentives for participation helped offset this  
440 frustration.

441 Interventions to improve the quality of DHIMS2 data can take technical approaches (e.g.,  
442 improving paper data collection forms, developing electronic tools, mHealth approaches  
443 employing tablets or smartphones, data quality audits/assessments, data storage) or behavioral  
444 approaches (e.g., short- or long-term training, task-shifting, supportive supervision,  
445 stakeholder engagement, incentives, standardized protocols) (11). Of all interventions, training

446 is the most commonly implemented component, and is widely shown to have a positive impact  
447 on data quality. A study of primary health facilities in Nigeria associated training on data  
448 management with statistically significant increases in completeness of reporting, accuracy,  
449 timeliness, and feedback (29). However, a systematic review showed that interventions with  
450 multiple components that include training showed greater benefit than those that tested single  
451 intervention components (11). A cross-sectional study of health centers in Chad found that data  
452 errors were associated with high workload, stockouts, and unavailability of required data  
453 collection tools, as well as the absence of a health technician and dedicated staff for data  
454 management (30). These visits also offer opportunities to utilize electronic tools that increase  
455 data completeness and reduce errors (31). Across Tanzania, electronic Malaria Services and  
456 Data Quality Improvement tools are used during supportive supervision visits to assess the  
457 quality of routinely collected malaria data reported from health facilities; the tools include a  
458 data quality assessment component, and facilities develop action plans to address deficiencies  
459 in service quality identified by the tools (32). Our study showed that data coaching fostered the  
460 implementation of functional data management systems in accordance with standards of  
461 practice that may strengthen data collection at all levels. Data coaching can also offer an  
462 opportunity to evaluate working conditions for clinic personnel, as improvements in workload,  
463 staffing, and facility readiness may also improve DHIMS2 data quality.

464 Strategies that visualize and track health facility indicators—including wall charts, scorecards,  
465 and dashboards—are increasingly popular tools to encourage interpretation and use of data for  
466 improved performance at the facility and district level. In our study, data coaching activities  
467 promoted the creation and display of wall charts, which rose over successive follow-up visits.  
468 While studies across health sectors generally demonstrate that data visualization approaches  
469 can improve the quality and completeness of data, and improved access to and use of data at  
470 district, region, and national levels (21,33,34), their effectiveness in promoting effective use of

471 data at the facility level remains largely unmeasured (35). Most examples are of data being  
472 reported upward in the health system, and how data are used is rarely detailed. In Nigeria, a  
473 national project to promote use of dashboards using routine data for decision making led to  
474 increased completeness of DHIS2 reports from 53% to 81% over three years of the project, but  
475 primary healthcare governance structures and limited human resource capacity constrained use  
476 of data for decision making (36). In Zanzibar, Jhpiego worked with the Ministry of Health to  
477 construct a dashboard integrating multiple sources of malaria-related data (37). The dashboard  
478 identified decision-making errors addressed through supportive supervision visits, as well as  
479 underutilization of primaquine at private health facilities, prompting the Ministry of Health to  
480 develop job aids and antimalarial record books. In Malawi, Hazel et al documented improved  
481 reporting consistency and use of data-display wall charts for integrated community case  
482 management after a data quality and use package was introduced that included a wall chart  
483 template for data display, training for health surveillance assistants and supervisors, and a  
484 participatory approach that engaged community and facility health workers in program  
485 improvement (21). Some participants reported using data in wall charts for program  
486 improvement—for example, to track stock-outs. Sustained support and supervision appear  
487 crucial for the success of this modality, as use of the tools declined once scaled up nationally  
488 from a smaller pilot. Similarly, use of laminated or electronic wall charts developed in 20  
489 countries under the Maternal and Child Survival Program was sustained in only half of these  
490 countries after the project concluded (38). By documenting adoption of wall charts and reports  
491 of data use by managers at the second follow-up visit, our study contributes evidence that data  
492 coaching visits can empower managers and providers at the facility level, but leadership should  
493 consider sustainability of these efforts.

494 More importantly, surprisingly little research has investigated what data are actually used by  
495 managers of primary health care facilities for decisions about service delivery (39). Although

496 the DHIS2 software platform is used to support HMIS in more than 70 countries, including  
497 Ghana's DHIMS2, underutilization or non-use of data by facilities is common (6). Few  
498 examples of DHIS2 data use at the local level have been captured in the academic or  
499 programmatic literature, particularly for malaria (40). While data can shape effective policy  
500 and evidence-based practices, neither possession of nor access to high quality data guarantees  
501 its use for decision-making, as a host of organizational factors shape data use (41). For  
502 example, in Tanzania, Mboera et al found that while two-thirds of facility respondents used  
503 HMIS data, only 38.5% routinely analyzed it due to poor data utilization and inadequate data  
504 analysis in most districts and health facilities, stemming from insufficient resources, inadequate  
505 incentives and supervision, and nonexistent standard operating procedures for data  
506 management (42). A mixed-methods study of prevention of mother-to-child transmission of  
507 HIV programs in South Africa found that while 53% of study facilities used data, "use"  
508 primarily meant reporting program outputs to the provincial level, not informing decisions and  
509 planning (43). The study found an absence of a culture of data use, low trust in the data, and  
510 poor data literacy among program and facility managers.

511 By promoting data culture, which involves designing systems that support work practices and  
512 provide forums for conversations around data, data coaching can change health worker  
513 perceptions (40). Our findings suggest that data coaching is supporting a culture of data use in  
514 Ghana to encourage effective commodity management at facility and district levels, as well as  
515 improved case management at the facility level. In Malawi, Kumwenda et al found that health  
516 workers providing HIV services saw data management as part of their role, but generally  
517 viewed these responsibilities as secondary to provision of clinical care (44). Strategies that  
518 motivate health workers to adopt data quality improvement practices at health facilities can  
519 promote a data culture that in turn leads to effective data use at the facility level; where  
520 workloads are heavy or where private sector providers are involved, financial incentives or



521 recognition can nurture a culture of data use (28,45). Even where health workers articulate the  
522 need for an effective health data management system, they may lack technical capacity, policy  
523 support, infrastructure, or facility readiness, particularly in rural areas (46). Regular data review  
524 meetings, supportive supervision, provision of feedback, and training on computer skills and  
525 data collection tools are strategies that can help health workers comprehend the significance  
526 and utility of data they collect (33,44).

527 Sustainable investment in improving data quality requires a systems approach and appropriate  
528 governance at all levels of the health system. To make locally appropriate and timely decisions  
529 about services, workforce, and procurement, facilities need disaggregated data and managers  
530 empowered to create enabling environments (39). Improving the quality of health data requires  
531 continuous effort from health facilities, feedback mechanisms between programs, health  
532 officers, and providers, and a willingness to make course corrections at all levels (6). Going  
533 forward, the impact of data coaching approaches to improve malaria services may be enhanced  
534 and made more sustainable through the use of supportive technologies. Electronic tools to  
535 improve data quality and data use are increasingly used to supplement training efforts. While  
536 many low- and middle-income countries have moved in recent years toward electronic data  
537 collection systems to streamline data collection (30), these systems do not ensure overall data  
538 quality, nor do they directly promote effective understanding and use of data, particularly at  
539 the local level (47). A review of data quality and data use in routine HMIS found that  
540 interventions to improve data quality were most effective when they combined capacity  
541 building activities such as training, coaching, or supportive supervision with technology  
542 enhancement, and that data use for planning rose when interventions promoting data  
543 availability were combined with technology enhancement (3). Coupling data coaching with  
544 electronic tools for data collection, analysis, and visualization may achieve even greater gains  
545 in data quality and data use.

546 Activities were carried out on a limited budget as part of program activities. We did not  
547 evaluate or investigate the organizational culture, infrastructure, or staffing at each study  
548 facility, which Daneskohan et al note may have a significant influence on how health workers  
549 collect, report, and use data (48). Changes in HMIS error rates and data completeness may be  
550 attributable to programmatic or ecological factors other than the data coaching intervention.  
551 We relied on self-reports from providers and managers about how data were being used, which  
552 may be inflated due to social desirability bias. Additionally, the intervention did not include  
553 enhanced technologies that have been shown to magnify the impact of data quality  
554 improvement initiatives; this is an area ripe for future research.

## 555 **Conclusions**

556 In primary health care facilities in Ghana, a data coaching intervention improved data  
557 documentation, management, and reported use for local planning. Participatory development  
558 of facility-specific action plans using the PDSA continuous improvement approach promoted  
559 local investment in quality improvement. While there are few documented examples of data  
560 coaching to improve the quality of malaria surveillance and service data in the academic  
561 literature, data coaching—or similar efforts to provide targeted supportive supervision and  
562 mentorship on data quality, visualization, and use—offers a model for other malaria  
563 intervention programs to document and use HMIS data effectively to improve service quality  
564 at the facility level.

## 565 **Acknowledgments**

566 The authors are grateful for the support and expertise of the PMI Impact Malaria in Ghana  
567 team. We would especially like to thank the Ghana National Malaria Elimination Program, as  
568 well as regional, district, and facility health management teams for their partnership, support,

569 and leadership. The authors would also like to thank Dr. Mark Kabue for his guidance in  
570 conceptualizing the manuscript.

## 571 **References**

- 572 1. Mphatswe W, Mate K, Bennett B, Ngidi H, Reddy J, Barker P, et al. Improving public  
573 health information: a data quality intervention in KwaZulu-Natal, South Africa. *Bull*  
574 *World Health Organ.* 2012;90(3).
- 575 2. AbouZahr C, Boerma T. Health information systems: the foundations of public health.  
576 *Bull World Health Organ.* 2005;83:578–83.
- 577 3. Lemma S, Janson A, Persson LÅ, Wickremasinghe D, Källestål C. Improving quality  
578 and use of routine health information system data in low- and middle-income  
579 countries: A scoping review. Francis JM, editor. *PLoS One* [Internet]. 2020 Oct 8  
580 [cited 2023 Mar 18];15(10):e0239683. Available from:  
581 <https://dx.plos.org/10.1371/journal.pone.0239683>
- 582 4. Getachew N, Erkalo B, Garedew MG. Data quality and associated factors in the health  
583 management information system at health centers in Shashogo district, Hadiya zone,  
584 southern Ethiopia, 2021. *BMC Med Inform Decis Mak* [Internet]. 2022 Dec 1 [cited  
585 2023 Mar 27];22(1):154. Available from:  
586 [https://bmcmedinformdecismak.biomedcentral.com/articles/10.1186/s12911-022-](https://bmcmedinformdecismak.biomedcentral.com/articles/10.1186/s12911-022-01898-3)  
587 [01898-3](https://bmcmedinformdecismak.biomedcentral.com/articles/10.1186/s12911-022-01898-3)
- 588 5. Nisingizwe MP, Iyer HS, Gashayija M, Hirschhorn LR, Amoroso C, Wilson R, et al.  
589 Toward utilization of data for program management and evaluation: Quality  
590 assessment of five years of health management information system data in Rwanda.  
591 *Glob Health Action.* 2014;7(1).
- 592 6. Maïga A, Jiwani SS, Mutua MK, Porth TA, Taylor CM, Asiki G, et al. Generating  
593 statistics from health facility data: The state of routine health information systems in  
594 Eastern and Southern Africa [Internet]. Vol. 4, *BMJ Global Health.* BMJ Publishing  
595 Group; 2019 [cited 2023 Jun 19]. p. 1849. Available from: <http://gh.bmj.com/>
- 596 7. Ohiri K, Ukoha NK, Nwangwu CW, Chima CC, Ogundeji YK, Rone A, et al. An  
597 Assessment of Data Availability, Quality, and Use in Malaria Program Decision  
598 Making in Nigeria. *Health Syst Reform* [Internet]. 2016 Oct 1 [cited 2022 Mar  
599 12];2(4):319–30. Available from: <http://www.ncbi.nlm.nih.gov/pubmed/31514720>
- 600 8. Hung YW, Hoxha K, Irwin BR, Law MR, Grépin KA. Using routine health  
601 information data for research in low- and middle-income countries: A systematic  
602 review [Internet]. Vol. 20, *BMC Health Services Research.* BioMed Central; 2020  
603 [cited 2023 Mar 28]. p. 1–15. Available from: [https://doi.org/10.1186/s12913-020-](https://doi.org/10.1186/s12913-020-05660-1)  
604 [05660-1](https://doi.org/10.1186/s12913-020-05660-1)
- 605 9. Mutale W, Chintu N, Amoroso C, Awoonor-Williams K, Phillips J, Baynes C, et al.  
606 Improving health information systems for decision making across five sub-Saharan  
607 African countries: Implementation strategies from the African Health Initiative. *BMC*  
608 *Health Serv Res* [Internet]. 2013 [cited 2023 Mar 30];13(SUPPL.2). Available from:  
609 <https://pubmed.ncbi.nlm.nih.gov/23819699/>
- 610 10. Gimbel S, Mwanza M, Nisingizwe MP, Michel C, Hirschhorn L, Hingora A, et al.  
611 Improving data quality across 3 sub-Saharan African countries using the Consolidated  
612 Framework for Implementation Research (CFIR): Results from the African Health  
613 Initiative. *BMC Health Serv Res.* 2017 Dec 21;17.

- 614 11. Lee J, Lynch CA, Hashiguchi LO, Snow RW, Herz ND, Webster J, et al. Interventions  
615 to improve district-level routine health data in low-income and middle-income  
616 countries: A systematic review [Internet]. Vol. 6, *BMJ Global Health*. BMJ Publishing  
617 Group; 2021 [cited 2023 Jun 19]. Available from:  
618 <https://pubmed.ncbi.nlm.nih.gov/34117009/>
- 619 12. Andrada A, Herrera S, Yé Y. Are new national malaria strategic plans informed by the  
620 previous ones? A comprehensive assessment of sub-Saharan African countries from  
621 2001 to present. Vol. 18, *Malaria Journal*. BioMed Central Ltd.; 2019.
- 622 13. World Health Organization. Country health information systems: a review of the  
623 current situation and trends. Geneva; 2011.
- 624 14. World Health Organization. Global technical strategy for malaria 2016-2030, 2021  
625 update [Internet]. Geneva; [cited 2024 Mar 10]. Available from:  
626 <https://www.who.int/publications/i/item/9789240031357>
- 627 15. Roll Back Malaria Partnership. Action and Investment to Defeat Malaria 2016-2030  
628 For a Malaria-Free World. Geneva; 2015.
- 629 16. World Health Organization. World Malaria Report 2021. Geneva: World Health  
630 Organization; 2021.
- 631 17. World Health Organization. Analysis and use of health facility data: Guidance for  
632 malaria programme managers [Internet]. Geneva; 2018. Available from:  
633 [https://www.who.int/healthinfo/FacilityAnalysisGuidance\\_RMNCAH.pdf](https://www.who.int/healthinfo/FacilityAnalysisGuidance_RMNCAH.pdf)
- 634 18. Ghana Health Service. Ghana Health Service Annual Report. Accra; 2021.
- 635 19. Aung T, Niyeha D, Heidkamp R. Leveraging data visualization to improve the use of  
636 data for global health decision-making. *J Glob Health*. 2019;9(2).
- 637 20. Karijo EK, Otieno GO, Mogere S. Determinants of Data Use for Decision Making in  
638 Health Facilities in Kitui County, Kenya. *Quest Journal of Management and Social  
639 Sciences*. 2021;3(1).
- 640 21. Hazel E, Chimbalanga E, Chimuna T, Nsona H, Mtimuni A, Kaludzu E, et al. Using  
641 data to improve programs: Assessment of a data quality and use intervention package  
642 for integrated community case management in Malawi. *Glob Health Sci Pract*  
643 [Internet]. 2017 Sep 1 [cited 2023 Jun 20];5(3):355–66. Available from:  
644 <https://pubmed.ncbi.nlm.nih.gov/28963172/>
- 645 22. Avortri GS, Nabukalu JB, Nabyonga-Orem J. Supportive supervision to improve  
646 service delivery in low-income countries: is there a conceptual problem or a strategy  
647 problem? *BMJ Glob Health* [Internet]. 2019 Oct [cited 2023 Mar 27];4(Suppl  
648 9):e001151. Available from: <https://pubmed.ncbi.nlm.nih.gov/31673434/>
- 649 23. Taylor MJ, McNicholas C, Nicolay C, Darzi A, Bell D, Reed JE. Systematic review of  
650 the application of the plan-do-study-act method to improve quality in healthcare  
651 [Internet]. Vol. 23, *BMJ Quality and Safety*. BMJ Publishing Group; 2014 [cited 2024  
652 Feb 22]. p. 290–8. Available from: [/pmc/articles/PMC3963536/](https://pmc/articles/PMC3963536/)
- 653 24. Kobo. KoBoCollect application. Cambridge, MA: KoboToolbox; 2021.
- 654 25. StataCorp. Stata Statistical Software: Release 14.2. College Station, TX: StataCorp  
655 LP; 2015.
- 656 26. ATLAS.ti 7.5 Windows. Berlin, Germany: ATLAS.ti Scientific Software  
657 Development GmbH; 2016.
- 658 27. PMI Measure Malaria. Coaching and mentorship approach promotes capacity  
659 strengthening in reporting, analysis, and use of health data among subnational staff in  
660 Madagascar. President’s Malaria Initiative [Internet]. 2021 Apr [cited 2023 Mar 30];  
661 Available from: <https://www.measuremalaria.org/news/coaching-and-mentorship-approach-promotes-capacity-strengthening-in-reporting-analysis-and-use-of-health-data-among-subnational-staff-in-madagascar/>  
662  
663

- 664 28. Hutchinson E, Nayiga S, Nabirye C, Taaka L, Westercamp N, Rowe AK, et al.  
665 Opening the ‘black box’ of collaborative improvement: a qualitative evaluation of a  
666 pilot intervention to improve quality of malaria surveillance data in public health  
667 centres in Uganda. *Malar J* [Internet]. 2021 Dec 1 [cited 2024 Feb 15];20(1):289.  
668 Available from: [https://malariajournal.biomedcentral.com/articles/10.1186/s12936-](https://malariajournal.biomedcentral.com/articles/10.1186/s12936-021-03805-z)  
669 [021-03805-z](https://malariajournal.biomedcentral.com/articles/10.1186/s12936-021-03805-z)
- 670 29. Nwankwo B, Sambo MN. Can training of health care workers improve data  
671 management practice in health management information systems: A case study of  
672 primary health care facilities in Kaduna State, Nigeria. *Pan African Medical Journal*  
673 [Internet]. 2018 [cited 2023 Jun 19];30. Available from:  
674 <https://pubmed.ncbi.nlm.nih.gov/30637073/>
- 675 30. Moukéné A, de Cola MA, Ward C, Beakgoubé H, Baker K, Donovan L, et al. Health  
676 management information system (HMIS) data quality and associated factors in  
677 Massaguet district, Chad. *BMC Med Inform Decis Mak* [Internet]. 2021 Dec 1 [cited  
678 2023 Jun 19];21(1). Available from: <https://pubmed.ncbi.nlm.nih.gov/34809622/>
- 679 31. Burnett SM, Wun J, Evance I, Davis KM, Smith G, Lussiana C, et al. Introduction and  
680 evaluation of an electronic tool for improved data quality and data use during malaria  
681 case management supportive supervision. *American Journal of Tropical Medicine and*  
682 *Hygiene* [Internet]. 2019 [cited 2023 Jun 19];100(4):889–98. Available from:  
683 <https://pubmed.ncbi.nlm.nih.gov/30793695/>
- 684 32. National Malaria Control Programme (NMCP) TanzaniaM of HCDGE and C.  
685 Operational manual for implementing malaria services and data quality improvement  
686 (MSDQI). Dar es Salaam; 2017.
- 687 33. Tchoualeu DD, Elmouaad HE, Osadebe LU, Adegoke OJ, Nnadi C, Haladu SA, et al.  
688 Use of a district health information system 2 routine immunization dashboard for  
689 immunization program monitoring and decision making, Kano State, Nigeria. *Pan Afr*  
690 *Med J* [Internet]. 2021 [cited 2023 Jun 19];40(Suppl 1):2. Available from:  
691 <https://pubmed.ncbi.nlm.nih.gov/36157564/>
- 692 34. Schulze A, Brand F, Geppert J, Böhl GF. Digital dashboards visualizing public health  
693 data: a systematic review. *Front Public Health* [Internet]. 2023 [cited 2023 Jun  
694 20];11:999958. Available from: <http://www.ncbi.nlm.nih.gov/pubmed/37213621>
- 695 35. Buttigieg SC, Pace A, Rathert C. Hospital performance dashboards: a literature review.  
696 *Journal of Health, Organisation and Management* [Internet]. 2017 [cited 2023 Jun  
697 20];31(3):385–406. Available from: <https://pubmed.ncbi.nlm.nih.gov/28686130/>
- 698 36. Etamesor S, Ottih C, Salihu IN, Okpani AI. Data for decision making: using a  
699 dashboard to strengthen routine immunisation in Nigeria. *BMJ Glob Health* [Internet].  
700 2018 Oct [cited 2023 Jun 19];3(5):e000807. Available from:  
701 <https://pubmed.ncbi.nlm.nih.gov/30294456/>
- 702 37. PMI Impact Malaria. Integrated Malaria Dashboard Enhances Data Use for Decision-  
703 Making in Zanzibar [Internet]. 2023 [cited 2024 Feb 15]. Available from:  
704 [https://impactmalaria.org/news-and-blog/posts/integrated-malaria-dashboard-](https://impactmalaria.org/news-and-blog/posts/integrated-malaria-dashboard-enhances-data-use-for-decision-making-in-zanzibar)  
705 [enhances-data-use-for-decision-making-in-zanzibar](https://impactmalaria.org/news-and-blog/posts/integrated-malaria-dashboard-enhances-data-use-for-decision-making-in-zanzibar)
- 706 38. MCSP. [https://mcsprogram.org/across-africa-data-dashboards-in-health-facilities-are-](https://mcsprogram.org/across-africa-data-dashboards-in-health-facilities-are-improving-decision-making/)  
707 [improving-decision-making/](https://mcsprogram.org/across-africa-data-dashboards-in-health-facilities-are-improving-decision-making/). 2019 [cited 2024 Feb 15]. Across Africa, Data  
708 Dashboards in Health Facilities are Improving Decision Making. Available from:  
709 [https://mcsprogram.org/across-africa-data-dashboards-in-health-facilities-are-](https://mcsprogram.org/across-africa-data-dashboards-in-health-facilities-are-improving-decision-making/)  
710 [improving-decision-making/](https://mcsprogram.org/across-africa-data-dashboards-in-health-facilities-are-improving-decision-making/)
- 711 39. Scott V, Gilson L. Exploring how different modes of governance act across health  
712 system levels to influence primary healthcare facility managers’ use of information in  
713 decision-making: Experience from Cape Town, South Africa Lucy Gilson. *Int J Equity*

- 714 Health [Internet]. 2017 Sep 15 [cited 2023 Jun 19];16(1). Available from:  
715 <https://pubmed.ncbi.nlm.nih.gov/28911323/>
- 716 40. Byrne E, Sæbø JI. Routine use of DHIS2 data: a scoping review. *BMC Health Serv*  
717 *Res* [Internet]. 2022 Dec 1 [cited 2023 Jun 19];22(1). Available from:  
718 <https://pubmed.ncbi.nlm.nih.gov/36203141/>
- 719 41. Hoxha K, Hung YW, Irwin BR, Grépin KA. Understanding the challenges associated  
720 with the use of data from routine health information systems in low- and middle-  
721 income countries: A systematic review [Internet]. Vol. 51, *Health Information*  
722 *Management Journal*. SAGE Publications Inc.; 2022 [cited 2023 Jun 19]. p. 135–48.  
723 Available from: <https://pubmed.ncbi.nlm.nih.gov/32602368/>
- 724 42. Mboera LEG, Rumisha SF, Mbata D, Mremi IR, Lyimo EP, Joachim C. Data  
725 utilisation and factors influencing the performance of the health management  
726 information system in Tanzania. *BMC Health Serv Res* [Internet]. 2021 Dec 1 [cited  
727 2023 Jun 19];21(1). Available from: <https://pubmed.ncbi.nlm.nih.gov/34030696/>
- 728 43. Nicol E, Dudley L, Bradshaw D. Assessing the quality of routine data for the  
729 prevention of mother-to-child transmission of HIV: An analytical observational study  
730 in two health districts with high HIV prevalence in South Africa. *Int J Med Inform*  
731 [Internet]. 2016 Nov [cited 2018 Jul 16];95:60–70. Available from:  
732 <http://www.ncbi.nlm.nih.gov/pubmed/27697233>
- 733 44. Kumwenda WWI, Kunyenje G, Gama J, Chinkonde J, Martinson F, Hoffman I, et al.  
734 Information management in Malawi’s prevention of mother-to-child transmission  
735 (PMTCT) program: Health workers’ perspectives. *Malawi Medical Journal* [Internet].  
736 2017 Dec 1 [cited 2023 Jun 19];29(4):306–10. Available from:  
737 <https://pubmed.ncbi.nlm.nih.gov/29963285/>
- 738 45. Bennett A, Avanceña ALV, Wegbreit J, Cotter C, Roberts K, Gosling R. Engaging the  
739 private sector in malaria surveillance: A review of strategies and recommendations for  
740 elimination settings [Internet]. Vol. 16, *Malaria Journal*. BioMed Central Ltd.; 2017  
741 [cited 2024 Feb 16]. Available from: <https://pubmed.ncbi.nlm.nih.gov/28615026/>
- 742 46. Miiro C, Ndawula JC, Musudo E, Nabuuma OP, Mpaata CN, Nabukenya S, et al.  
743 Achieving optimal health data impact in rural African healthcare settings: measures to  
744 barriers in Bukomansimbi District, Central Uganda. *Int J Equity Health* [Internet].  
745 2022 Dec 1 [cited 2023 Jun 19];21(1). Available from:  
746 <https://pubmed.ncbi.nlm.nih.gov/36577986/>
- 747 47. Kebede M, Adeba E, Adeba E, Chego M. Evaluation of quality and use of health  
748 management information system in primary health care units of east Wollega zone,  
749 Oromia regional state, Ethiopia. *BMC Med Inform Decis Mak* [Internet]. 2020 Jun 12  
750 [cited 2023 Jun 19];20(1). Available from: <https://pubmed.ncbi.nlm.nih.gov/32532256/>
- 751 48. Daneshkohan A, Alimoradi M, Ahmadi M, Alipour J. Data quality and data use in  
752 primary health care: A case study from Iran. *Inform Med Unlocked*. 2022 Jan 1;28.

753

## 754 **Supporting Information**

755

756 **S1 Fig. Completed wall chart.**

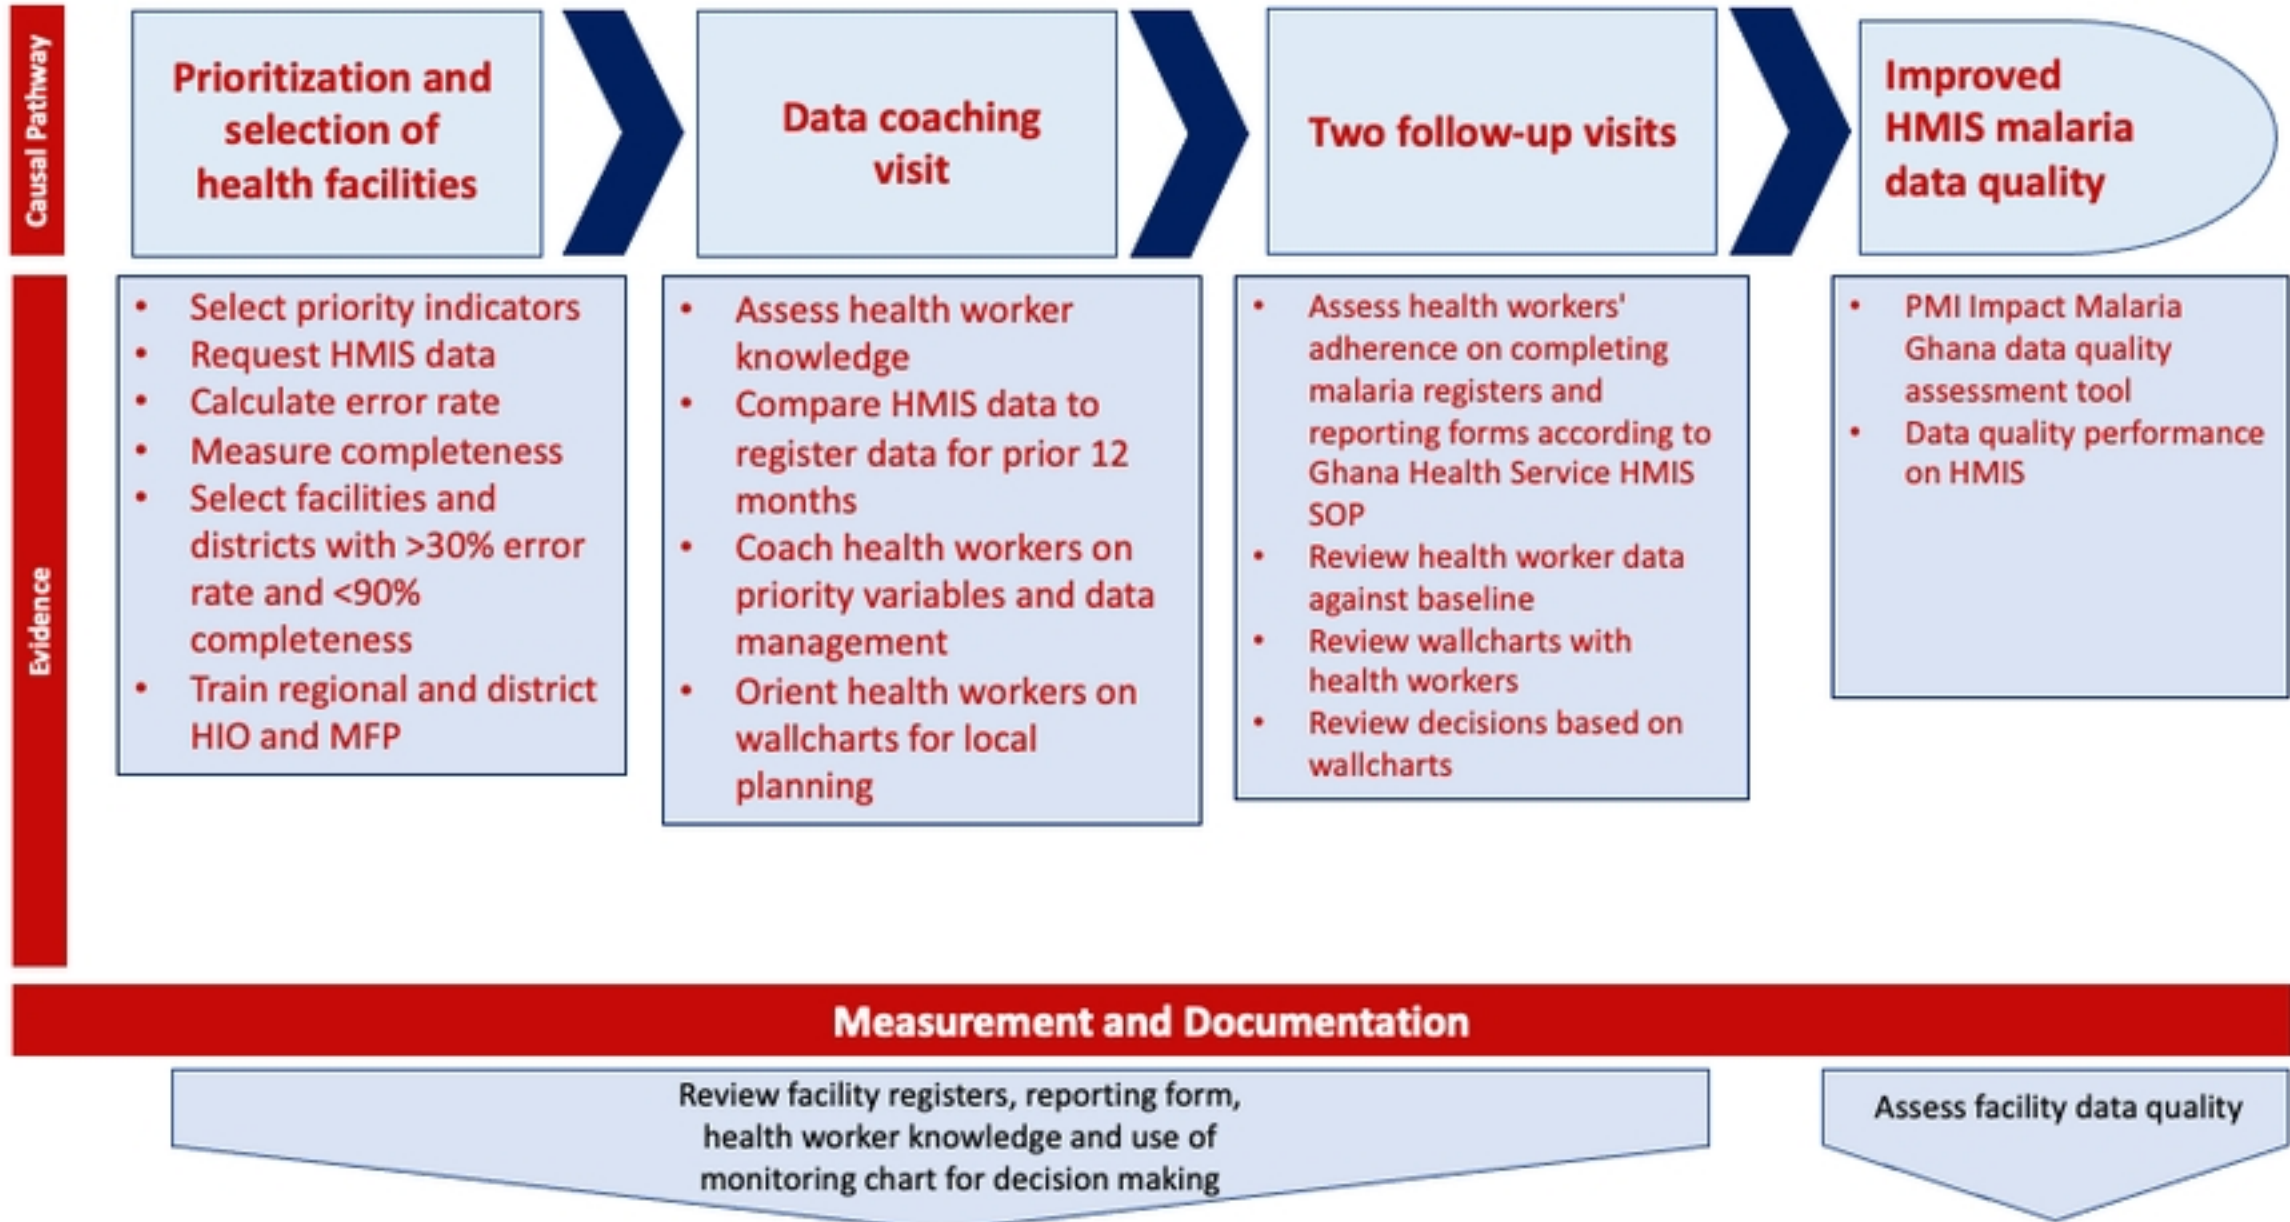

*DHIMS2: District Health Information Management System version 2, HIO: Health Information Officer, MFP: Malaria Focal Person, SOP: Standard Operating Procedure*

Figure 1

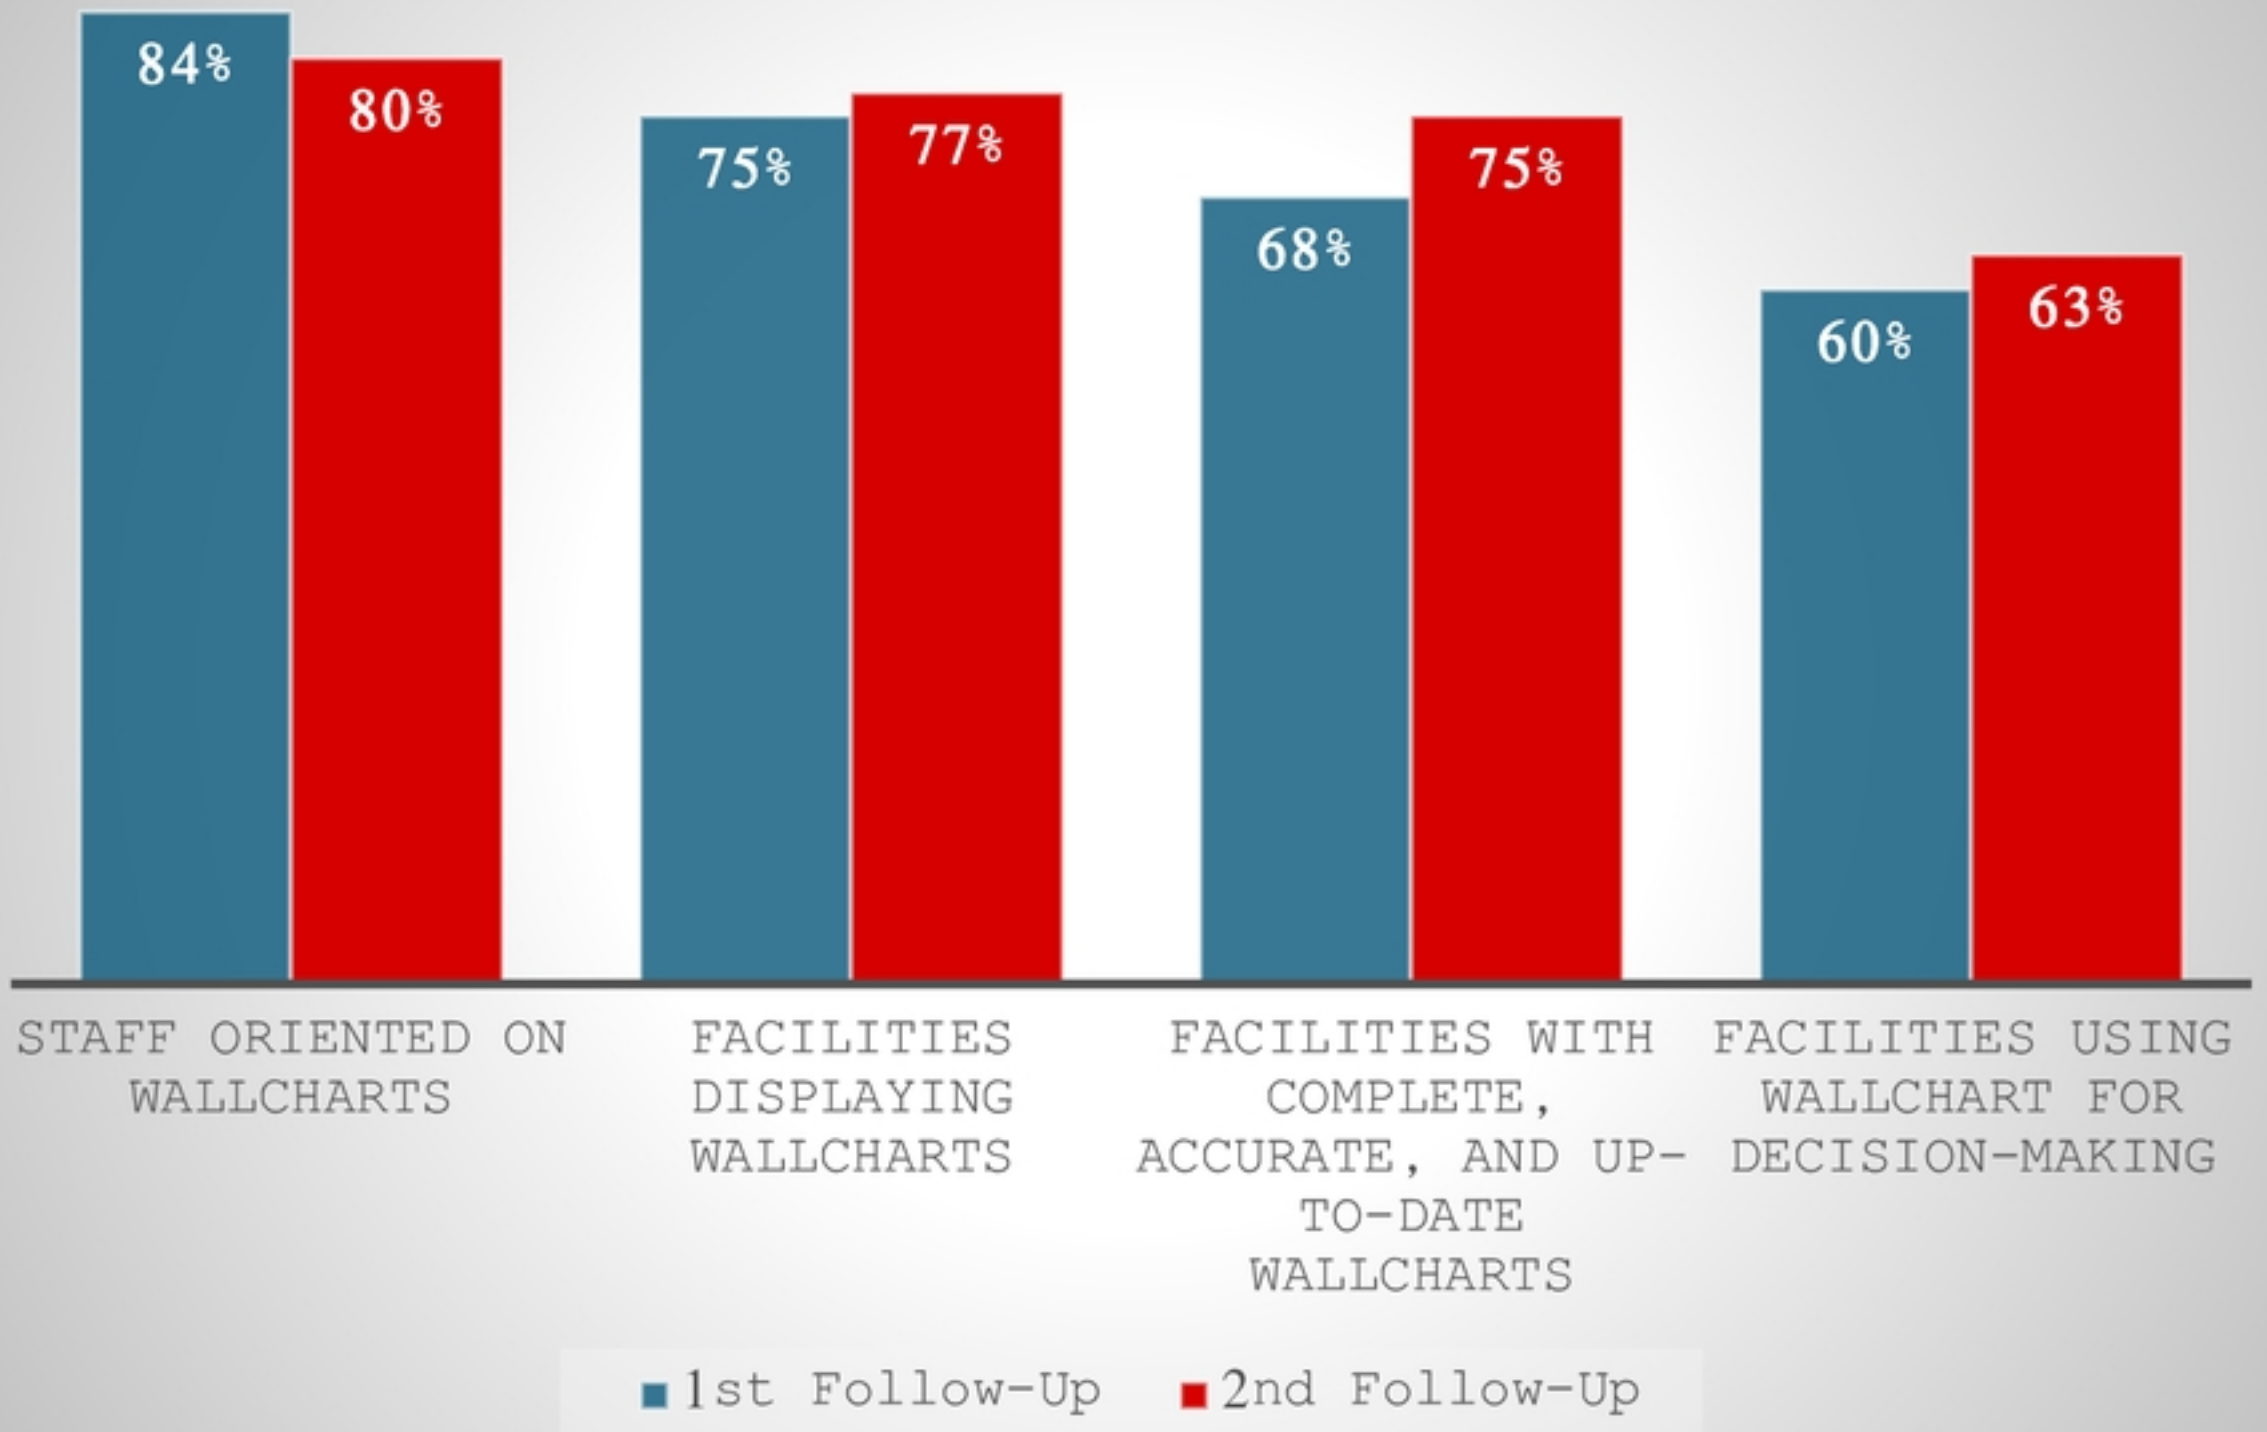

Figure 2
